1       **Title: Supplementation with short-chain fatty acids and the prebiotic 2FL**  
2                               **improves clinical outcome in PD**

3  
4       **Authors:** Tobias Hegelmaier, MD<sup>1†</sup>, Alexander Duscha, MSc<sup>1†</sup>, Christiane Desel, PhD<sup>1†</sup>,  
5       Sabrina Fuchs<sup>1</sup>, Michal Shapira, PhD<sup>3,4</sup>, Qihao Shan, MSc<sup>5</sup>, Gabriele I Stangl, MD<sup>6</sup>, Frank  
6       Hirche, PhD<sup>6</sup>, Stefan Kempa, PhD<sup>7</sup>, András Maifeld, MD, PhD<sup>7</sup>, Lisa-Marie Würtele<sup>8</sup>, Jana  
7       Peplinski<sup>8</sup>, Diana Jauk<sup>8</sup>, Claudia A. Dumitru, PhD<sup>9</sup>, Ute Obermüller-Jevic, PhD<sup>10</sup>, Svein-Olaf  
8       Hustvedt<sup>11</sup>, Nina Timmesfeld, PhD<sup>12</sup>, Ralf Gold, MD<sup>8</sup>, Antonia Zapf, PhD<sup>13</sup>, Ibrahim E.  
9       Sandalcioglu, MD<sup>9</sup>, Sanaz Mostaghim, PhD<sup>5</sup>, Horst Przuntek, MD<sup>14</sup>, Eran Segal, PhD<sup>3,4</sup>, Nissan  
10      Yissachar, PhD<sup>15, ‡</sup>, Aiden Haghikia, MD<sup>1,2, ‡,\*</sup>

11       **Affiliations:**

12      <sup>1</sup> Department of Neurology, Otto-von-Guericke University, Magdeburg, Germany.

13      <sup>2</sup> German Center for Neurodegenerative Diseases (DZNE), Magdeburg, Germany.

14      <sup>3</sup> Department of Molecular Cell Biology, Weizmann Institute of Science, Rehovot, Israel.

15      <sup>4</sup> Department of Computer Science and Applied Mathematics, Weizmann Institute of Science,  
16      Rehovot, Israel.

17      <sup>5</sup> Faculty of Computer Science, Otto-von-Guericke University Magdeburg, Magdeburg,  
18      Germany.

19      <sup>6</sup> Institute of Agricultural and Nutritional Sciences, Martin-Luther-University Halle-Wittenberg,  
20      Halle (Saale), Germany.

21 <sup>7</sup> Integrative Metabolomics and Proteomics, Berlin Institute of Medical Systems Biology/Max  
22 Delbrück Center for Molecular Medicine, Berlin, Germany.

23 <sup>8</sup> Department of Neurology, Ruhr University Bochum, St. Josef Hospital Bochum, Bochum,  
24 Germany.

25 <sup>9</sup> Department for Neurosurgery, Otto-von-Guericke University, Magdeburg, Germany.

26 <sup>10</sup> Nutrition & Health Division, GBU Nutrition Ingredients, BASF SE, Ludwigshafen, Germany.

27 <sup>11</sup> Nutrition & Health Division, GBU Pharma Solutions, BASF A/S, Oslo, Norway.

28 <sup>12</sup> Department for Medical Informatics, Biometry and Epidemiology, Ruhr-University, Bochum,  
29 Germany.

30 <sup>13</sup> Institute of Medical Biometry and Epidemiology, University Medical Center Hamburg-  
31 Eppendorf, Hamburg, Germany.

32 <sup>14</sup> Clinic of Neurology II, EVK Hattingen, Hattingen, Germany.

33 <sup>15</sup> The Mina and Everard Goodman Faculty of Life Sciences, Bar-Ilan University, Ramat-Gan,  
34 Israel; Bar-Ilan Institute of Nanotechnology and Advanced Materials, Bar-Ilan University,  
35 Ramat-Gan, Israel.

36 †equally contributing first authors

37 ‡equally contributing authors

38 \*Corresponding author:

39 Aiden Haghikia, Dpt. Neurology, Otto-von-Guericke University, Leipziger Str. 44, 39120  
40 Magdeburg, Germany, +49-391-6713431, [aiden.haghikia@med.ovgu.de](mailto:aiden.haghikia@med.ovgu.de)

41 **Running Title:**

42 SCFA supplementation in PD.

43 **Financial Disclosure/Conflict of Interest:**

44 Competing interests: U. O.-J. is an employee of BASF SE, Ludwigshafen, Germany. S.-O. H. is  
45 an employee of BASF A/S, Oslo, Norway. A. H. and R. G. have filed a patent on the supportive  
46 immunomodulatory effect of C3-C8 aliphatic fatty acids. A. H. and H. P. have filed a patent on  
47 the prophylactic and/or supportive therapeutic treatment of PD. The other authors declare no  
48 competing interests.

49 **ABSTRACT**

50 Background: Parkinson's disease (PD) is associated with dysbiosis, proinflammatory gut  
51 microbiome, disruptions to intestinal barrier functions, and immunological imbalance. Microbiota-  
52 produced short-chain fatty acids promote gut barrier integrity and immune regulation, but their  
53 impact on PD pathology remains mostly unknown.

54 Objectives: To evaluate supplementation with short-chain fatty acids as an add-on intervention in  
55 PD.

56 Methods: In a randomized double-blind prospective study, 72 PD patients received short-chain  
57 fatty acids and/or the prebiotic fiber 2'-fucosyllactose supplementation over 6 months.

58 Results: We observed improvement in motor and nonmotor symptoms, in addition to modulation  
59 of peripheral immunity and improved mitochondrial respiration in immunocytes. The  
60 supplementation had no effect on microbiome diversity or composition. Finally, multiobjective  
61 analysis and comprehensive immunophenotyping revealed parameters associated with an optimal  
62 response to short-chain fatty acids and/or 2'-fucosyllactose supplementation.

63 Conclusion: Short-chain fatty acids ameliorate clinical symptoms in Parkinson's disease patients  
64 and modulate mitochondrial function and peripheral immunity.

## 65 INTRODUCTION

66 Parkinson's disease (PD) is one of the most common progressive systemic neurodegenerative  
67 disorders, affecting millions of people worldwide. Despite intensive research, the cause of  
68 neurodegeneration is not fully understood. The current state of research assumes a multifactorial  
69 etiology. In addition to sporadic forms of genetic predisposition, mitochondrial dysfunction,  
70 oxidative stress and neuroinflammation, also environmental factors play a crucial role.<sup>1</sup>  
71 Gastrointestinal symptoms are often the first nonmotor symptoms in PD, in addition to olfactory  
72 dysfunction, which in most cases occur years to decades before the first motor symptoms, i.e.,  
73 rigor, tremor and akinesia.<sup>2</sup> PD incidence rates are rising in addition to changes in nutrition and  
74 the consumption of Western-style diets, which are low in fiber and high in saturated fats and  
75 refined carbohydrates. These dietary habits lead to a dysbiotic intestinal microbiota and altered  
76 metabolome as well as intestinal inflammation.<sup>3</sup> Growing evidence supports the idea that microbial  
77 dysbiosis, leaky gut syndrome and a proinflammatory intestinal environment are central  
78 components of the pathogenesis of PD.<sup>4-7</sup>

79 The gut metabolome is essential for metabolic homeostasis but is also involved in communication  
80 between the microbiome and the subepithelial structures of the gut, which has multifold systemic  
81 implications for the organism. Short-chain fatty acids (SCFAs) are a major group of metabolites  
82 involved in the microbiome-gut interaction and are produced through the anaerobic fermentation  
83 of dietary fibers. A large proportion of SCFAs are metabolized by colonocytes or in the liver,  
84 where they contribute to the energy supply. However, a broad range of intracellular SCFA effects  
85 are also mediated by G-protein-coupled receptors and SCFA transporters. These include

86 maintenance of intestinal barrier integrity, mucus production, protection against intestinal and  
87 systemic inflammation and blood–brain barrier (BBB) permeability.<sup>8</sup> In PD patients, the levels of  
88 SCFA-producing bacteria and fecal SCFAs are significantly reduced.<sup>9</sup> In a recent study  
89 investigating the potential therapeutic effect of propionate (PA), we observed a putative  
90 neuroprotective effect in addition to immune regulation.<sup>10</sup> Targeting the gut-brain axis via the  
91 microbiome, metabolome and intestinal barrier is a promising approach for future therapies for  
92 PD. Consumption of prebiotic fibers has recently been tested in a small cohort of PD patients over  
93 10 days.<sup>11</sup> However, SCFA supplementation in PD patients over a prolonged period has not yet  
94 been evaluated.

95 Here, we conducted a randomized, double-blind prospective study over 6 months to investigate  
96 direct supplementation of the SCFAs PA and butyric acid (BA) and the prebiotic 2'-fucosyllactose  
97 (2FL).<sup>12</sup> The primary endpoints of this study were the impact on microbiome diversity and  
98 composition as well as changes of SCFA concentration in stool and serum. Because the study was  
99 exploratory, no correction for multiplicity and no confirmatory statements are made. The  
100 secondary endpoints were the effect on the clinical parameters defined by The Movement Disorder  
101 Society-Sponsored Revision of the Unified Parkinson's Disease Rating Scale (MDS-UPDRS III),  
102 levodopa equivalent daily dose (LEDD), PANDA, and olfactory score. We identified novel  
103 mechanistic connections between SCFA supplementation, systemic immunity and clinical  
104 outcomes in PD patients.

## 105 **METHODS**

### 106 **Study design and analysis**

107 The study was performed from November 2019 to August 2020 after being approved by the Ethics  
108 Committee of the Ruhr-University Bochum (November 2019; registration number 19-6713). Prior

109 to participation, all subjects signed informed consent forms. This clinical trial was registered in  
110 the German Clinical Trials Register (DRKS; registration number DRKS00027061). A total of 94  
111 participants were assessed for eligibility and 72 were confirmed for randomization and assigned  
112 to one treatment group upon recruitment. Randomization was performed by permuted block  
113 randomization to one of the three study arms. The randomization list was prepared by BASF SE  
114 and provided to the hospital pharmacy in a sealed envelope. All patients were instructed to take  
115 either 3810 mg PA+BA capsules (BA: 2550 mg; PA: 1260 mg) with 2400 mg placebo, 3250 mg  
116 2FL capsules with 3200 mg placebo or 3250 mg 2FL capsules with 3810 mg PA+BA capsules  
117 daily for up to 6 months in combination with existing PD-specific therapy. The PA+BA, 2FL and  
118 placebo were provided as delayed-release capsules by BASF SE. Individual subjects were seen at  
119 the outpatient clinic every 3 months after initiation of supplementation and underwent complete  
120 neurological assessment performed by a certified Neurostatus C neurologist. Blood and fecal  
121 samples were collected at the Department of Neurology, St. Josef Hospital Bochum, at the Clinic  
122 of Neurology II, EVK Hattingen, and at the University Clinic of Neurology, UK Magdeburg.  
123 Clinical data were evaluated by 2-way ANOVA with time and treatment as factors or mixed effects  
124 analysis with patient as random effect. It was not corrected for multiplicity, so the p-values are  
125 used as descriptive measures. Fecal samples were immediately frozen at -80°C. Serum tubes were  
126 centrifuged at 30 min after the blood draw, and the supernatant frozen at -80°C. For isolation of  
127 PBMCs, blood was drawn in EDTA tubes and separated using Cytiva Ficoll-Paque™ PLUS.  
128 Isolated cells were frozen in CTL-Cryo medium (Immunospot) and stored at -80°C.

### 129 **Quantification of SCFA levels in serum and fecal samples**

130 Methods of sample preparation were previously described.<sup>10</sup> SCFA levels were measured by  
131 HPLC–MS/MS (Agilent 1100 HPLC).

## 132 **Metagenomic sequencing and bioinformatics analysis**

133 Metagenomic DNA was extracted using the DNeasy PowerMag Soil DNA extraction kit (Qiagen).  
134 Next-generation sequencing (NGS) libraries were prepared using Illumina's Nextera DNA library  
135 prep and sequenced on an Illumina NovaSeq sequencing platform with 100 bp single-end reads at  
136 a depth of 10 million reads per sample. Reads containing Illumina adapters and low-quality reads  
137 were filtered out, and ends of low-quality reads trimmed. Reads were mapped to the human  
138 genome using bowtie with inclusive parameters, and matches were discarded. The relative  
139 abundance of bacterial species was obtained by an expanded microbial genome reference,<sup>13</sup> with  
140 default parameters. Microbiome  $\alpha$ -diversity was calculated by the Shannon diversity index.  
141 Richness was calculated as the number of species in the sample detected with an abundance of at  
142 least  $1e-4$ . All abundances were logarithmically transformed. To evaluate the discriminative power  
143 of microbial composition for response prediction, we developed an XGBoost<sup>14</sup> prediction model  
144 that exclusively utilizes microbiome features as inputs and outperforms other methods for human  
145 microbiome data classification.<sup>15</sup> The receiver operating characteristic (ROC) curves mean and  
146 standard deviation were calculated using the curves produced in a fivefold cross-validation  
147 approach. To ensure the model's robustness, we conducted a label-swapping analysis to determine  
148 that the performance of the model was no better than random prediction, resulting in an area under  
149 the curve (AUC) value very close to 0.5. To gain insights into the model's interpretability, we  
150 utilized SHAP (SHapley Additive explanation)<sup>16</sup> to analyze feature attributes. The SHAP values  
151 represent the average change in the model's output when conditioning on a specific feature.

## 152 **Immunophenotyping**

153 For in-depth immunophenotyping archived PBMCs were stained according to standard protocols.  
154 Antibodies used and gating strategies applied are listed in Supplementary Tables S1,S2. Staining

155 panels and gatings were modified based on Monaco et al.<sup>17</sup> Data was recorded on a BD  
156 FACSCelesta™ with standardized application settings.

### 157 **Treg *in vitro* assays**

158 Treg suppression assays were performed as previously described<sup>10</sup> using whole blood from a  
159 validation cohort of PD patients at baseline and after 14 days of supplementation with 2FL or  
160 BA+PA. For Treg/PBMC cocultures with *in vitro* addition of BA and PA, blood from healthy  
161 controls or PD patients without SCFA supplementation was used. Treg/PBMC cells were isolated  
162 as described and seeded on a 1:1 ratio in serum free TheraPEAK™ X-VIVO™ 15 (Lonza) without  
163 CFSE staining. Cells were stimulated with 5 µg/ml PHA (Phytohemagglutinin, Merck), 150 µM  
164 BA (Merck) and 150 µM PA (Merck) for 4 days. Cell culture supernatants were analyzed using a  
165 LEGENDplex™ Human Essential Immune Response Panel (BioLegend) and recoded on a BD  
166 FACSCelesta™.

### 167 **qPCR analysis of sorted Tregs**

168 PBMCs from the validation cohort were isolated and  $5 \times 10^7$  cells stained with αCD4-FITC  
169 (RPAT4, BD Biosciences), αCD25-APC (BC69, BioLegend) and αCD127-PE (HIL-7R-M21, BD  
170 Biosciences). CD4<sup>+</sup>CD25<sup>+</sup>CD127<sup>lo</sup> Tregs were sorted on a BD FACSAria™ III. RNA was  
171 isolated using an RNeasy Micro kit (Qiagen) and transcribed using a QuantiTect® Reverse  
172 Transcription Kit (Qiagen). QPCR was performed on a QuantStudio™ 7 Real-Time PCR system  
173 using TaqMan® Fast Advanced Master Mix and TaqMan® Gene Expression assays (Applied  
174 Biosystems): *B2m*: Hs00187842\_m1, *Ccr8*: Hs04969449\_m1, *Cmcl1*: Hs00976539\_g1, *Crot*:  
175 Hs00221733\_m1, *Ctla4*: Hs00175480\_m1, *Foxp3*: Hs01085834\_m1, *Il10*: Hs00961622\_m1,  
176 *Il17rb*: Hs00218889\_m1, *Xpa*: Hs00902270\_m1.



## 177 **Seahorse XF Cell Mito Stress Test**

178 Cellular metabolic activity was measured using a Seahorse XFp Cell Mito Stress Test Kit (Agilent  
179 Technologies) on a Seahorse XFp analyzer according to the manufacturer's protocol. Frozen  
180 PBMCs were thawed and  $3 \times 10^5$  cells per well were seeded on poly-D-lysine-coated 6-well Agilent  
181 Seahorse XF Cell Culture Microplates in X-VIVO™ 15 (Lonza). Cells were incubated for 24 h at  
182 37°C prior to Seahorse assay performance. Individual parameters were calculated according to the  
183 Seahorse XFp Cell Mito stress test protocol.

## 184 **Multiobjective analysis**

185 Multiobjective analysis (MOA) is based on the concept of multiobjective optimization and is  
186 applied to problems with several conflicting objectives, where increasing the quality in one  
187 objective results in deteriorating the others. Multiobjective problems usually contain a subset of  
188 data points that are not dominated by others in the dataset and are located on a front surface if  
189 mapped to the objective space. The central idea concerns the nondominated sorting of a dataset<sup>18</sup>  
190 and then clustering the data according to the so-called fronts. The clinical dataset  $A$  of  $N$  patients,  
191 was sorted according to the domination criterion as follows: A data point  $X$  dominates a data point  
192  $Y$  given the objectives  $f_1 = \text{PANDA}$ ,  $f_2 = \text{MDS-UPDRSIII}$  and  $f_3 = \text{olfactory score}$  if:

$$193 \quad f_i(X) \leq f_i(Y), \forall i \text{ and } \exists j: f_j(X) < f_j(Y)$$

194 where  $<$  and  $\leq$  denote better and equal or better, respectively.

195 By applying the domination criterion to the dataset  $A$ , a subset of data points that are not dominated  
196 by any other was identified. This subset was indicated as Front 1. Next, the same procedure was  
197 performed on dataset  $A$  without the data points in F1. By performing this procedure iteratively, the  
198 dataset was sorted into several fronts from F1 (best subset) to Fw (worst subset). For further

199 analysis we took 20% of patients with the lowest and highest front numbers and sorted them into  
200 clusters  $A_1$  and  $A_2$ . For binary correlation-based feature selection the ratio  $\ln(V2/\text{baseline})$  for  
201 every determined physiological parameter was calculated and converted entries into rankings.  
202 Rankings were normalized (mean of 0 and standard deviation of 1) and the mean and standard  
203 deviation of the parameters was computed within each cluster. In this case, the mean describes the  
204 level of deviation of a particular parameter within a cluster from the rest of the population, while  
205 the standard deviation describes the level of concentration compared to the rest of the population.

#### 206 **Data Sharing:**

207 This study did not generate new unique reagents. All new datasets will be made freely available at  
208 the time of publication. Any additional information required to reanalyze the data reported in this  
209 work is available from the corresponding author upon request. This paper does not report any  
210 original code or algorithms. The code used in this study is freely available at  
211 <https://www.ci.ovgu.de/Research/Codes.html> and on GitHub.

## 212 **RESULTS**

### 213 **Improved clinical outcome upon 6 months supplementation in PD patients**

214 A total of 72 patients were included and randomly assigned to receive 2FL+placebo,  
215 PA+BA+placebo or a combination of 2FL+PA+BA. Study visits with detailed neurological  
216 examination and sample collection were performed at the beginning of the study (baseline) and  
217 after 3 (Visit1, V1) and 6 months (Visit2, V2) (Supplementary Fig. S1). Study groups were  
218 comparable in terms of baseline variables (Supplementary Table S3). Supplementation was  
219 generally well tolerated. One patient in the 2FL group discontinued treatment due to a mild  
220 nontreatment-associated adverse event, hence no follow up data are available.

221 We assessed extrapyramidal motor function using the MDS-UPDRS III<sup>19</sup> and LEED<sup>20</sup>, olfactory  
222 function using the Sniffin' Sticks test<sup>21</sup> and cognitive function using the PANDA.<sup>22</sup> All 3  
223 interventions showed a decrease in MDS-UPDRS III scores and LEED over the period of 6 months  
224 (Fig. 1A, B). Improvement in olfaction, however, was observed only in the 2FL and combination  
225 group 2FL+BA+PA (Fig. 1C), while PANDA revealed an improvement in cognitive functions in  
226 all groups (Fig. 1D). In sum, 6 months of supplementation with SCFA and/or 2FL improved motor  
227 function, led to a reduction in the LEED required and positively impacted olfactory and cognitive  
228 function in patients with PD.

### 229 **Gut microbiome diversity is not altered following supplementation**

230 We collected stool samples from all participants and performed shotgun metagenomic sequencing.  
231 Supplementation did not change microbiome diversity or richness in any of the study groups (Fig.  
232 2A,B) and concentrations of SCFA in fecal or serum samples were not elevated (Supplementary  
233 Fig. S2). Thus, consistent with our previous study<sup>10</sup>, SCFA and/or 2FL supplementation did not  
234 result in measurable alterations to gut microbiome composition.

### 235 **SCFA/2FL supplementation modulates immune cell subsets**

236 SCFAs have been shown to exert immunomodulatory effects;<sup>10, 23</sup> therefore, we performed in-  
237 depth characterization from cryopreserved peripheral blood mononuclear cells (PBMCs). We  
238 detected changes in cell proportions across almost all subsets analyzed (Fig. 2C). Thus,  
239 supplementation with 2FL and/or SCFA induces multifaceted alterations in the composition of the  
240 peripheral immune compartment.

241 Since we have previously shown that SCFA improves mitochondrial respiration and restores the  
242 suppressive function of regulatory T cells (Treg) in patients with multiple sclerosis (MS)<sup>10</sup>, we

243 recruited a validation cohort with n=4 PD patients receiving either 2FL or BA+PA. Maximal  
244 respiration was significantly elevated after 14 days of supplementation (Fig. 2D), suggesting that  
245 the intervention positively affected mitochondrial function. We did not detect any changes in Treg  
246 suppressive capacity, but sorted Tregs showed an increase in the expression of the mitochondrial  
247 genes (Supplementary Fig. S3A-C). We further assessed the functionality of Tregs by coculture  
248 experiments with and without the addition of BA+PA *in vitro*. Secretion of pro-inflammatory  
249 CXCL10 and IL2 was significantly decreased, while the levels of anti-inflammatory TGF $\beta$  and  
250 IL10 increased (Fig. 2E). In summary, SCFA supplementation improves mitochondrial respiration  
251 in immunocytes, inhibits the release of proinflammatory mediators and increases the secretion of  
252 anti-inflammatory mediators from immune cells.

### 253 **Distinct changes in immune cell subsets in responding patients**

254 While 6 months of supplementation improved motor function, this was not observed in all patients.  
255 In every intervention group, there were few patients with unchanged or increasing MDS-UPDRS  
256 III scores over time (Supplementary Fig. S3D). To gain insight into the mechanisms underlying  
257 successful SCFA intervention, we combined all 3 intervention groups and stratified them into  
258 responders (R: MDS-UPDRS III V2 < MDS-UPDRS III baseline) and nonresponders (NR: MDS-  
259 UPDRS III V2  $\geq$  MDS-UPDRS III baseline). We detected significant increases of CD4 T cells  
260 after 6 months of intervention (Fig. 3A). Supplementation differentially affected subsets of CD4  
261 T cells, with significantly increased Th1- and Th17 cells in the R and NR groups, while the levels  
262 of Th2 cells were significantly reduced only in responding patients. The levels of B cells were also  
263 significantly reduced both in the R and NR groups (Fig. 3B). Remarkably, the percentages of  
264 mucosal-associated invariant T cells (MAIT), nonclassic and intermediate monocyte subsets only  
265 significantly changed in responders (Fig. 3B). The percentages of other immune cell subsets were

266 not significantly altered. In summary, supplementation with 2FL and/or SCFA induces a multitude  
267 of changes in the composition of immune cell subsets in the blood regardless of treatment response,  
268 while increased numbers of MAIT cells and decreased numbers of nonclassic and intermediate  
269 monocytes seem to correlate exclusively with intervention-induced clinical improvement.

### 270 **Multiobjective analysis reveals parameters associated with best response to intervention**

271 We initially defined responders and nonresponders by a reduction in MDS-UPDRS III after 6  
272 months of supplementation. However, this method did not consider patients showing improvement  
273 in olfactory and/or cognitive function or improvement in one score but worsening in another score.  
274 Therefore, we devised an MOA to incorporate the various clinical measurements and thus more  
275 accurately determine the response to intervention. We performed nondominated sorting on the  
276 clinical parameter difference (V2 – baseline) with three metrics (objectives) olfactory score, MDS-  
277 UPDRS III and PANDA. We selected the 20% of patients who had the lowest and highest front  
278 numbers and sorted them into two clusters. These clusters included patients with the best/worst  
279 response to intervention (Fig. 4A). One major feature in our dataset concerns the different scales  
280 and distributions of the parameters, which makes it difficult to use existing statistical testing  
281 methodologies<sup>24</sup>. Therefore, we performed binary correlation-based feature selection to identify  
282 the physiological parameters that have the strongest correlation with the best/worst response to  
283 intervention. Using these two values, we identified the parameters with high levels of deviation  
284 that also had low levels of variation within a cluster (Fig. 4B). This approach enabled the  
285 identification of parameters associated with the best or worst combined clinical response (Fig. 4C).  
286 This novel approach of MOA revealed additional immune cell subsets associated with response to  
287 intervention. We identified CD4 Tfh cells as the parameter with the highest correlation to clinical  
288 response (Fig. 4D). This association was not evident when immune cell data were stratified by

289 median split on MDS-UPDRS III (Fig. 4E). Thus, MOA is a promising novel approach to identify  
290 parameters associated with response to intervention in complex datasets with several conflicting  
291 metrics describing clinical outcome and a highly diverse repertoire of metrics recorded as potential  
292 correlates.

### 293 **PD patients' microbiome before 2FL+BA+PA supplementation is associated with response**

294 To assess whether the response to supplementation was affected by the patients' microbiome, we  
295 used baseline microbiome abundances, as they may hold a potential to predict the impact of  
296 intervention. We devised a prediction model utilizing an XGBoost classifier. The model solely  
297 uses baseline microbiome data as its inputs and outputs a prediction of the treatment response. The  
298 model based on the microbiome of patients who received only 2FL or BA+PA had no predictive  
299 capability. However, the model predicted response when it was established based on the baseline  
300 microbiome of participants who received 2FL+BA+PA (Fig. 4F). We conducted SHapley Additive  
301 exPlanations (SHAP) analysis (Fig. 4G) to understand which species had the greatest impact on  
302 the model's prediction. Our analysis revealed that *Streptococcus* sp001556435 and *Agathobacter*  
303 *rectalis* contributed to the prediction of nonresponders, whereas SFEL01 sp004557245 had a  
304 significant impact on the prediction of responders. *Agathobacter rectalis* is a SCFA-producing  
305 bacterium. Our study also revealed that the total abundance of SCFA-producing bacteria was  
306 significantly different between responders and nonresponders who were treated with  
307 2FL+BA+PA; responders had a lower abundance of SCFA-producing bacteria (Fig. 4H).

### 308 **DISCUSSION**

309 Here, we report that supplementation with SCFA improves clinical outcome in PD patients in a  
310 randomized double-blind 6-month prospective study with 72 patients. To our knowledge, this is

311 the first exploratory study of SCFAs in PD patients showing improvement in motor and nonmotor  
312 functions beyond the level provided by standard medication.

313 Collectively, improvements in hyposmia, motor and cognitive function as a result of SCFA  
314 supplementation show that the intervention has a systemic impact on multiple brain regions.  
315 Amelioration of motor and nonmotor symptoms suggests a neuroregenerative element of SCFA  
316 supplementation. While we were not able to collect cerebrospinal fluid (CSF) in this study, we  
317 have previously shown increased PA concentrations in CSF after supplementation in MS  
318 patients.<sup>10</sup> In addition, free fatty acid receptor 3 is expressed on the human brain endothelium, and  
319 its interaction protects the BBB from oxidative stress.<sup>25</sup> Thus, supplementation with SCFAs may  
320 also directly impact the BBB and CNS to promote neuroregeneration.

321 Supplementation did not alter microbial composition. Even though microbial dysbiosis has been  
322 reported in PD patients, our results suggest that amelioration of disease symptoms by SCFA and/or  
323 2FL supplementation does not require profound changes in gut microbe populations. The SCFA  
324 concentration in fecal samples also remained unaffected by supplementation, suggesting that  
325 excess SCFA is not excreted via stool. Over 95% of SCFAs produced in the colon are absorbed  
326 by the gut mucosa in healthy individuals<sup>26</sup> or transported via the portal vein to the liver, preventing  
327 escape into the systemic circulation.<sup>27</sup> Since SCFAs are not passed in the stool and serum levels  
328 only marginally increase, SCFAs are most likely swiftly metabolized.

329 Supplementation led to a significant increase in MAIT cells only in responding patients. At barrier  
330 surfaces, MAIT cells play an important role in the crosstalk between the host and the  
331 microbiome.<sup>28</sup> Importantly, a regulatory role for MAIT cells in neuroinflammation through  
332 suppression of pathogenic Th1 cells has been shown,<sup>29</sup> and reduced numbers of MAIT cells in  
333 peripheral blood have been reported in patients with several autoimmune diseases.<sup>30</sup> A shift toward

334 proinflammatory states in monocyte populations with a decrease in the levels of classic subsets  
335 and an increase in the levels of intermediate subsets with increased HLA-DR expression has been  
336 shown in PD,<sup>31</sup> and a large study on expression quantitative trait loci (eQTL) revealed the  
337 overrepresentation of PD-related genes in monocyte populations.<sup>32</sup> Decreased absolute counts of  
338 Tfh cells have also recently been reported in PD patients,<sup>33</sup> in addition to decreased numbers of  
339 circulating anti-inflammatory B-cell subsets, thus implicating defective B-cell regulation as  
340 another contributing factor in PD. In summary, we propose that supplementation with SCFAs acts  
341 in concert on innate-like lymphoid cells, monocytes and B cells to promote a reduced inflammatory  
342 immune response in PD patients.

343 Our prediction model suggests that the patient microbiome can predict the efficacy of 2FL and  
344 BA+PA supplementation. Specifically, the composition of the SCFA-producing gut microbiota  
345 affected the response, with responders having less SCFA-producing gut microbes, which could  
346 help explain why supplementation with SCFA induces a greater response rate among them. If  
347 validated in larger studies, such a model can help evaluate the chances of a specific patient  
348 benefitting from intervention before it is started. In summary, SCFA supplementation may be a  
349 promising disease-modifying strategy in PD, hence, a follow-up phase III clinical trial to  
350 investigate the therapeutic potential of SCFAs in PD is warranted.

### 351 **Acknowledgment:**

352 We thank Cathrine Husberg from BASF for her scientific contribution and energetic support. We  
353 thank Bärbel Henke from the Clinic of Neurology II, Hattingen for archiving the biomaterials. We  
354 thank Grazyna Debska-Vielhaber from the Department of Neurology, Magdeburg, for performing  
355 the seahorse assay. The help of Roland Hartig from the multiparametric bioimaging and cytometry



356 platform (MPBIC) of the Otto-von-Guericke University Magdeburg with FACS Aria cell sorting  
357 is greatly acknowledged.

### 358 **Author's Roles:**

359 Conceptualization: TH, AD, CD, UOJ, RG, HP, NY, AH

360 Methodology: TH, AD, CD, GIS, FH, SK, AM, NY, AH

361 Software: MS, QS, SM, ES, NY

362 Formal Analysis: TH, AD, CD, SF, MS, QS, GIS, FH, SK, AM, CAD, NT, AZ, IES, SM, ES,  
363 NY, AH

364 Investigation: TH, AD, CD, SF, MS, FH, AM, LMW, JP, DJ, CAD

365 Resources: UOJ, SOH

366 Data Curation: TH, AD, CD, SF, MS, QS, LMW, JP, DJ, SM, ES, NY, AH

367 Writing – Original Draft: TH, AD, CD, NY, AH

368 Writing – Review & Editing: TH, AD, CD, MS, GIS, AZ, IES, SM, HP, ES, NY, AH

369 Visualization: TH, AD, CD, SF, MS, QS, NY, AH

370 Supervision: RG, HP, ES, NY, AH

371 Project Administration: TH, AD, CD, HP, AH

372 Funding Acquisition: UOJ, SOH, HP, AH

### 373 **REFERENCES**

374 1. Poewe W, Seppi K, Tanner CM, et al. Parkinson disease. *Nat Rev Dis Primers* 2017;3:17013.

375 2. Schapira AHV, Chaudhuri KR, Jenner P. Non-motor features of Parkinson disease. *Nat Rev*  
376 *Neurosci* 2017;18(8):509.

377 3. Zinocker MK, Lindseth IA. The Western Diet-Microbiome-Host Interaction and Its Role in  
378 Metabolic Disease. *Nutrients* 2018;10(3).

- 379 4. Cryan JF, O'Riordan KJ, Sandhu K, Peterson V, Dinan TG. The gut microbiome in neurological  
380 disorders. *Lancet Neurol* 2020;19(2):179-194.
- 381 5. Forsyth CB, Shannon KM, Kordower JH, et al. Increased intestinal permeability correlates with  
382 sigmoid mucosa alpha-synuclein staining and endotoxin exposure markers in early Parkinson's  
383 disease. *PLoS One* 2011;6(12):e28032.
- 384 6. Nie S, Wang J, Deng Y, Ye Z, Ge Y. Inflammatory microbes and genes as potential biomarkers  
385 of Parkinson's disease. *NPJ Biofilms Microbiomes* 2022;8(1):101.
- 386 7. Romano S, Savva GM, Bedarf JR, Charles IG, Hildebrand F, Narbad A. Meta-analysis of the  
387 Parkinson's disease gut microbiome suggests alterations linked to intestinal inflammation. *NPJ*  
388 *Parkinsons Dis* 2021;7(1):27.
- 389 8. Visconti A, Le Roy CI, Rosa F, et al. Interplay between the human gut microbiome and host  
390 metabolism. *Nat Commun* 2019;10(1):4505.
- 391 9. Unger MM, Spiegel J, Dillmann KU, et al. Short chain fatty acids and gut microbiota differ  
392 between patients with Parkinson's disease and age-matched controls. *Parkinsonism Relat Disord*  
393 2016;32:66-72.
- 394 10. Duscha A, Gisevius B, Hirschberg S, et al. Propionic Acid Shapes the Multiple Sclerosis  
395 Disease Course by an Immunomodulatory Mechanism. *Cell* 2020;180(6):1067-1080 e1016.
- 396 11. Hall DA, Voigt RM, Cantu-Jungles TM, et al. An open label, non-randomized study  
397 assessing a prebiotic fiber intervention in a small cohort of Parkinson's disease participants. *Nat*  
398 *Commun* 2023;14(1):926.
- 399 12. Suligoj T, Vigsnaes LK, Abbeele PVD, et al. Effects of Human Milk Oligosaccharides on  
400 the Adult Gut Microbiota and Barrier Function. *Nutrients* 2020;12(9).

- 401 13. Leviatan S, Shoer S, Rothschild D, Gorodetski M, Segal E. An expanded reference map of  
402 the human gut microbiome reveals hundreds of previously unknown species. *Nat Commun*  
403 2022;13(1):3863.
- 404 14. Chen T, Guestrin C. XGBoost: A Scalable Tree Boosting System. *Proceedings of the 22nd*  
405 *ACM SIGKDD International Conference on Knowledge Discovery and Data Mining*. San  
406 Francisco, California, USA: Association for Computing Machinery; 2016. p. 785–794.
- 407 15. Wang XW, Liu YY. Comparative study of classifiers for human microbiome data. *Med*  
408 *Microecol* 2020;4.
- 409 16. Lundberg SM, Erion GG, Lee S-I. Consistent Individualized Feature Attribution for Tree  
410 Ensembles. *ArXiv* 2018;abs/1802.03888.
- 411 17. Monaco G, Lee B, Xu W, et al. RNA-Seq Signatures Normalized by mRNA Abundance  
412 Allow Absolute Deconvolution of Human Immune Cell Types. *Cell Rep* 2019;26(6):1627-1640  
413 e1627.
- 414 18. Deb K, Agrawal S, Pratap A, Meyarivan T. A Fast Elitist Non-dominated Sorting Genetic  
415 Algorithm for Multi-objective Optimization: NSGA-II. 2000; Berlin, Heidelberg: Springer Berlin  
416 Heidelberg. p. 849-858.
- 417 19. Goetz CG, Tilley BC, Shaftman SR, et al. Movement Disorder Society-sponsored revision  
418 of the Unified Parkinson's Disease Rating Scale (MDS-UPDRS): scale presentation and  
419 clinimetric testing results. *Mov Disord* 2008;23(15):2129-2170.
- 420 20. Tomlinson CL, Stowe R, Patel S, Rick C, Gray R, Clarke CE. Systematic review of levodopa  
421 dose equivalency reporting in Parkinson's disease. *Mov Disord* 2010;25(15):2649-2653.
- 422 21. Cavaco S, Goncalves A, Mendes A, et al. Abnormal Olfaction in Parkinson's Disease Is  
423 Related to Faster Disease Progression. *Behav Neurol* 2015;2015:976589.

- 424 22. Michels J, van der Wurp H, Kalbe E, et al. Long-Term Cognitive Decline Related to the  
425 Motor Phenotype in Parkinson's Disease. *J Parkinsons Dis* 2022;12(3):905-916.
- 426 23. Correa-Oliveira R, Fachi JL, Vieira A, Sato FT, Vinolo MA. Regulation of immune cell  
427 function by short-chain fatty acids. *Clin Transl Immunology* 2016;5(4):e73.
- 428 24. Lualdi M, Fasano M. Statistical analysis of proteomics data: A review on feature selection.  
429 *J Proteomics* 2019;198:18-26.
- 430 25. Hoyles L, Snelling T, Umlai UK, et al. Microbiome-host systems interactions: protective  
431 effects of propionate upon the blood-brain barrier. *Microbiome* 2018;6(1):55.
- 432 26. Salminen S, Bouley C, Boutron-Ruault MC, et al. Functional food science and  
433 gastrointestinal physiology and function. *Br J Nutr* 1998;80 Suppl 1:S147-171.
- 434 27. Bloemen JG, Venema K, van de Poll MC, Olde Damink SW, Buurman WA, Dejong CH.  
435 Short chain fatty acids exchange across the gut and liver in humans measured at surgery. *Clin Nutr*  
436 2009;28(6):657-661.
- 437 28. Amini A, Pang D, Hackstein CP, Klenerman P. MAIT Cells in Barrier Tissues: Lessons from  
438 Immediate Neighbors. *Front Immunol* 2020;11:584521.
- 439 29. Miyazaki Y, Miyake S, Chiba A, Lantz O, Yamamura T. Mucosal-associated invariant T  
440 cells regulate Th1 response in multiple sclerosis. *Int Immunol* 2011;23(9):529-535.
- 441 30. Mechelli R, Romano S, Romano C, et al. MAIT Cells and Microbiota in Multiple Sclerosis  
442 and Other Autoimmune Diseases. *Microorganisms* 2021;9(6).
- 443 31. Thome AD, Atassi F, Wang J, et al. Ex vivo expansion of dysfunctional regulatory T  
444 lymphocytes restores suppressive function in Parkinson's disease. *NPJ Parkinsons Dis*  
445 2021;7(1):41.

446 32. Raj T, Rothamel K, Mostafavi S, et al. Polarization of the effects of autoimmune and  
447 neurodegenerative risk alleles in leukocytes. *Science* 2014;344(6183):519-523.

448 33. Li R, Tropea TF, Baratta LR, et al. Abnormal B-Cell and Tfh-Cell Profiles in Patients With  
449 Parkinson Disease: A Cross-sectional Study. *Neurol Neuroimmunol Neuroinflamm* 2022;9(2).

450

## 451 **Tables and Figure Legends**

452 **Fig. 1. Improved clinical outcome upon supplementation.** Clinical parameters determined at  
453 the first study visit (Baseline) and at the three (V1) and six (V2) month follow-ups. (A) MDS-  
454 UPDRS III, (B) LEDD, (C) olfactory score and (D) PANDA. Data plotted as before-after for each  
455 patient (gray) and mean (black)  $\pm$  SEM. Tested by 2-way ANOVA (C, D) or mixed effects analysis  
456 (E, F). \*\*\*\*  $p < 0.0001$ , \*\*\*  $p < 0.001$ , \*\*  $p < 0.01$ , \*  $p < 0.05$ .

457 **Fig. 2. Effect of supplementation on the gut microbiome and immune cells.** Shotgun  
458 metagenomic sequencing of  $n=71$  stool samples. (A) Shannon diversity, (B) richness of gut  
459 microbiota at baseline and V2. (C) Ratio of immune subsets at baseline (red) and 6 months (V2,  
460 blue). Mean (solid line)  $\pm$  SD (dashed lines), all interventions pooled. (D) Mitochondrial  
461 respiration; validation cohort at baseline (V0) and after 14 days of (V1,  $n=3$  2FL or BA+PA). Left:  
462 Oxygen-consumption rate (OCR) over time, middle: Maximal and right: Basal respiration, mean  
463  $\pm$  SD, significance determined by T test. (E) Treg/PBMC coculture assay of  $n=5$  healthy controls  
464 (HC) or PD patients, *in vitro* addition of BA+PA. Data presented as mean  $\pm$  SD, significance  
465 determined by Friedman multiple comparisons test.

466 **Fig. 3. Supplementation differentially affects immune cell subsets in responding patients.** (A)  
467 Proportions of CD4-, Th1-, Th17- and Th2 T cells among PBMCs, depicted as median split MDS-

468 UPDRS III responder/nonresponder, matched baseline and V2, mean  $\pm$  SEM. Significance was  
469 determined by paired T test. **(B)** Proportions of B cells, MAIT, nonclassic and intermediate  
470 monocyte populations in PBMCs depicted as median split MDS-UPDRS III  
471 responder/nonresponder, matched baseline and V2, mean  $\pm$  SEM. Significance was determined by  
472 paired T test. \*\*\*  $p < 0.001$ , \*\*  $p < 0.01$ , \* $p < 0.05$ .

473 **Fig. 4. Multiobjective analysis and prediction modeling reveal parameters associated with**  
474 **the best/worst response to intervention.** **(A)** Nondominated sorting based on olfactory score,  
475 MDS-UPDRS III and PANDA (V2 – baseline). The clusters of patients with the best (red) and  
476 worst (blue) 20% performances. **(B)** Examples of an uncorrelated (upper panel) and a correlated  
477 parameter (lower panel). Solid points depict ranking (not to scale), and transparent points the raw  
478 values, data points in the best cluster (red). Mean of all rankings (solid black line) and mean only  
479 in the best cluster (dashed red line). **(C)** Nondominated ranking of physiological parameters  
480 associated with the best/worst response. **(D)** Proportions of CD4 Tfh cells from patients within the  
481 best and worst clusters, matched baseline and V2, black line mean  $\pm$  SEM. **(E)** Proportions of CD4  
482 Tfh cells in all patients, median split MDS-UPDRS III responder/nonresponder, matched baseline  
483 and V2, black line mean  $\pm$  SEM. Significance was determined by paired T test. **(F)** Prediction  
484 model for distinguishing R from NR: ROC curve of a prediction model based solely on  
485 microbiome baseline features (blue). **(G)** SHAP analysis of the model. **(H)** Abundances of SCFA-  
486 producing bacteria before supplementation with 2FL+BA+PA, \* $p < 0.05$ .

487 **Supplementary Fig. S1.** CONSORT 2010 flow diagram. CONSolidated Standards of Reporting  
488 Trials: Schematic representation of the randomized double-blind prospective study.

489 **Supplementary Fig. S2. SCFA concentration in stool and serum is not altered after**  
490 **supplementation.** Concentrations of PA and BA in stool **(A)** and in serum **(B)** samples measured

491 by HPLC–MS/MS. Data are plotted as before-after for each patient (gray) and mean (black) +/-  
492 SEM. Tested by 2-way ANOVA with Sidak’s multiple comparisons test.

493 **Supplementary Fig. S3: Supplementation with SCFA does not boost the suppressive capacity**  
494 **of Tregs but increases the expression of mitochondrial genes.** (A) Treg/PBMC suppression  
495 assay at baseline (V0) and 14-day follow-up (V1), samples from validation cohort; MACS-sorted  
496 cells. (B, C) Gene expression in sorted Tregs from validation cohort; FACS-sorted cells. (B)  
497 Heatmap of fold changes follow-up (V1) and (C) individual  $2^{-\Delta\text{CT}}$  values for *Crot* and *Xpa*.  
498 Housekeeping *B2m*, time points compared by Wilcoxon matched pairs test. (D) Responders (R:  
499 MDS-UPDRS III V2 < MDS-UPDRS III baseline) and nonresponders (NR: MDS-UPDRS III V2  
500  $\geq$  MDS-UPDRS III baseline) stratified by group. Data plotted as heatmap (ratio V2/baseline) and  
501 MDS-UPDRS III before-after for each patient; responders (blue) and nonresponders (pink).

502 **Supplementary Table S1:** List of antibodies used for in-depth immunophenotyping.

503 **Supplementary Table S2:** Gating strategies for in-depth immuno-phenotyping of immune cell  
504 subsets. Adapted from Monaco et al.<sup>17</sup>.

505 **Supplementary Table S3. Demographic data and characteristics of patients prior to**  
506 **therapeutic intervention.** Main demographics and clinical and treatment characteristics of  
507 participants at study entry. Data are presented as the mean  $\pm$  SD or n (%).

Figure 1

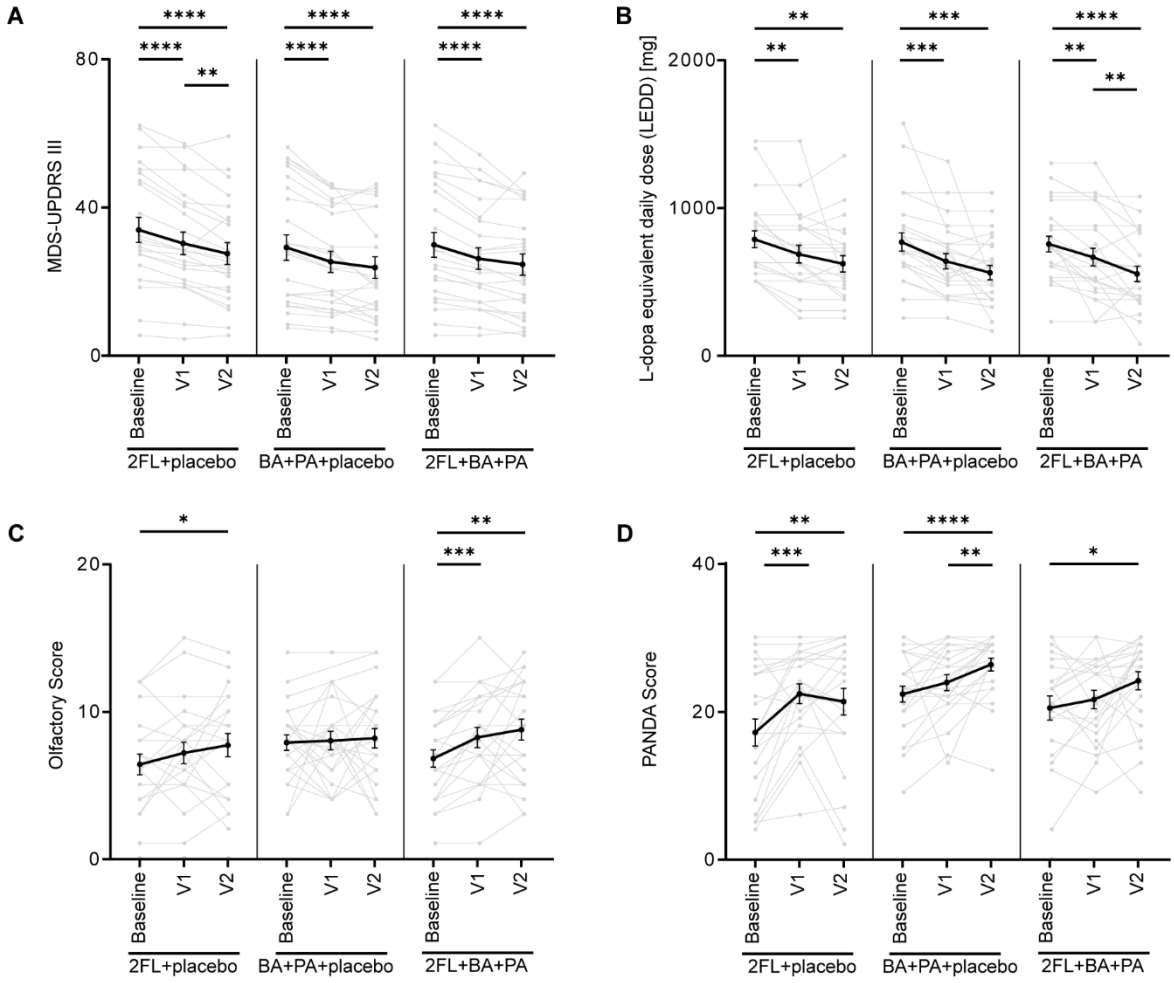



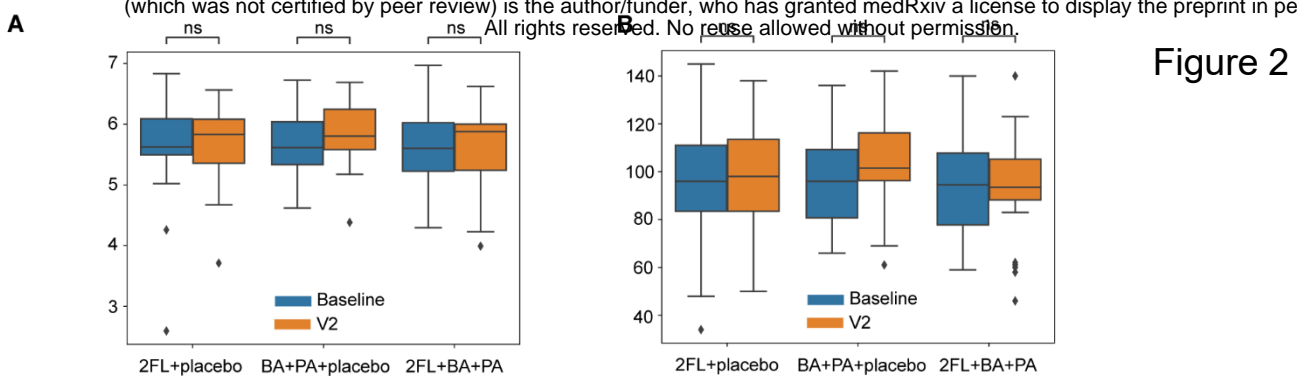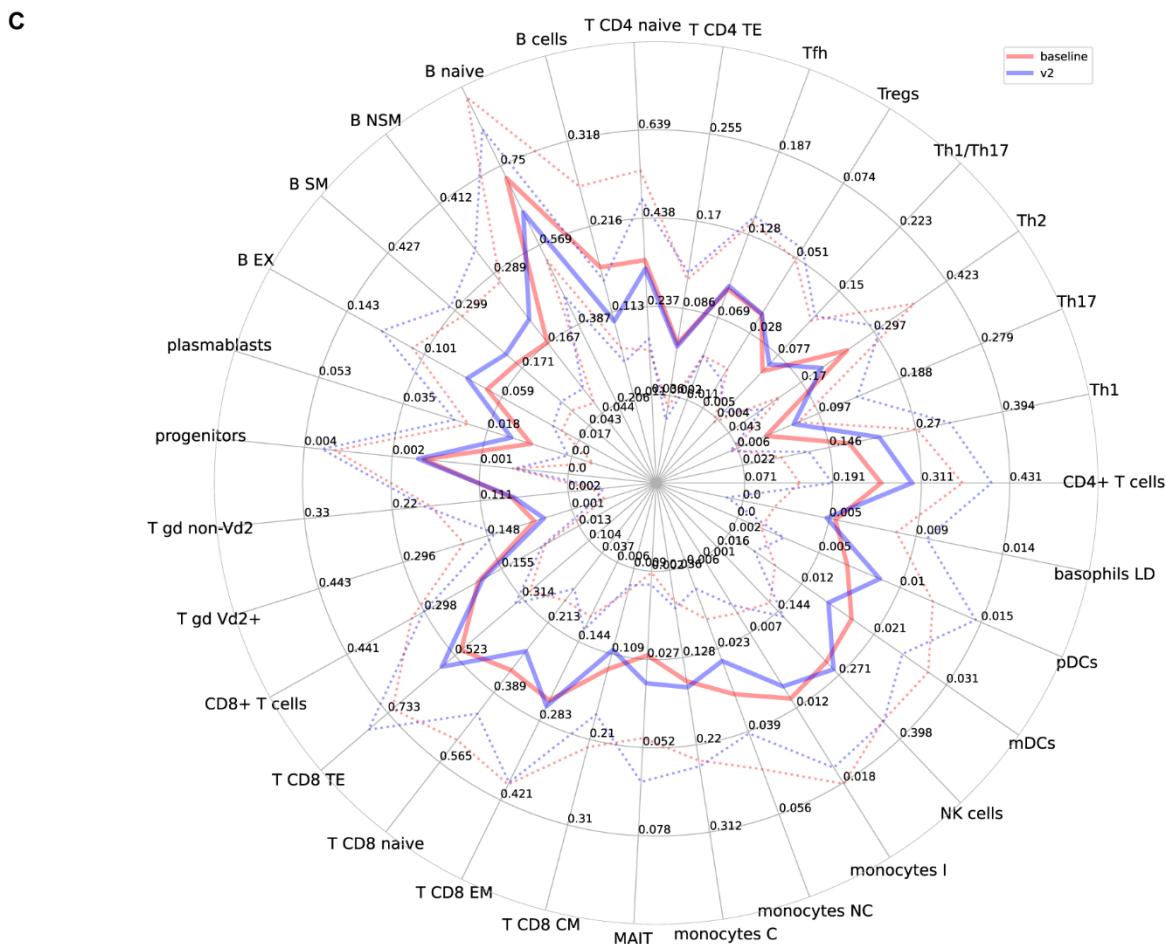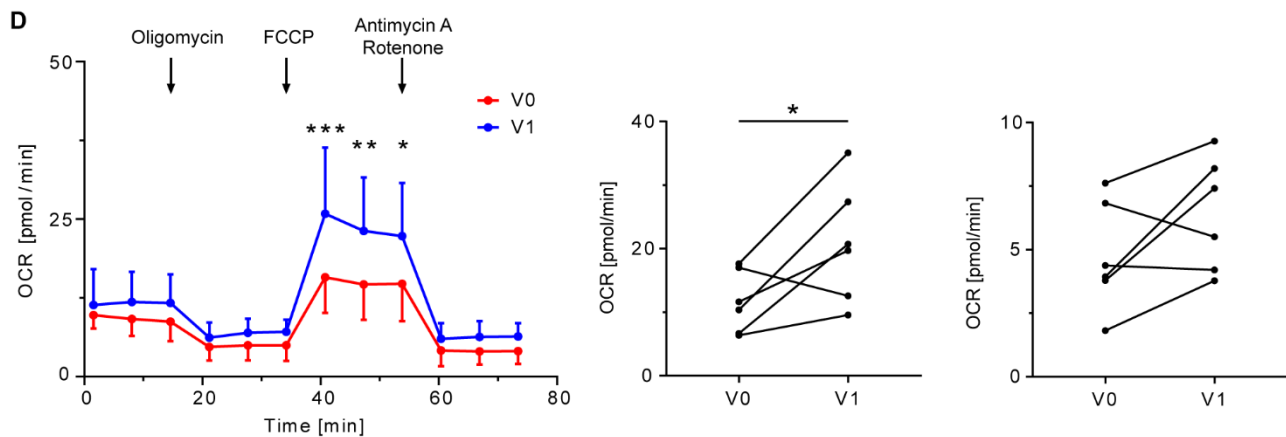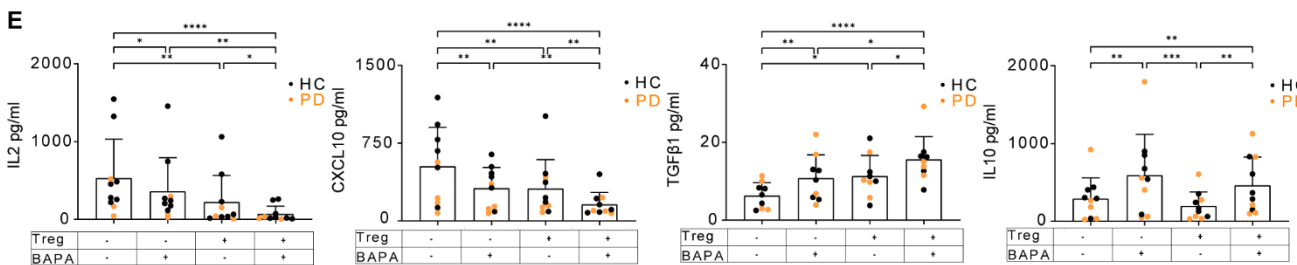

Figure 3

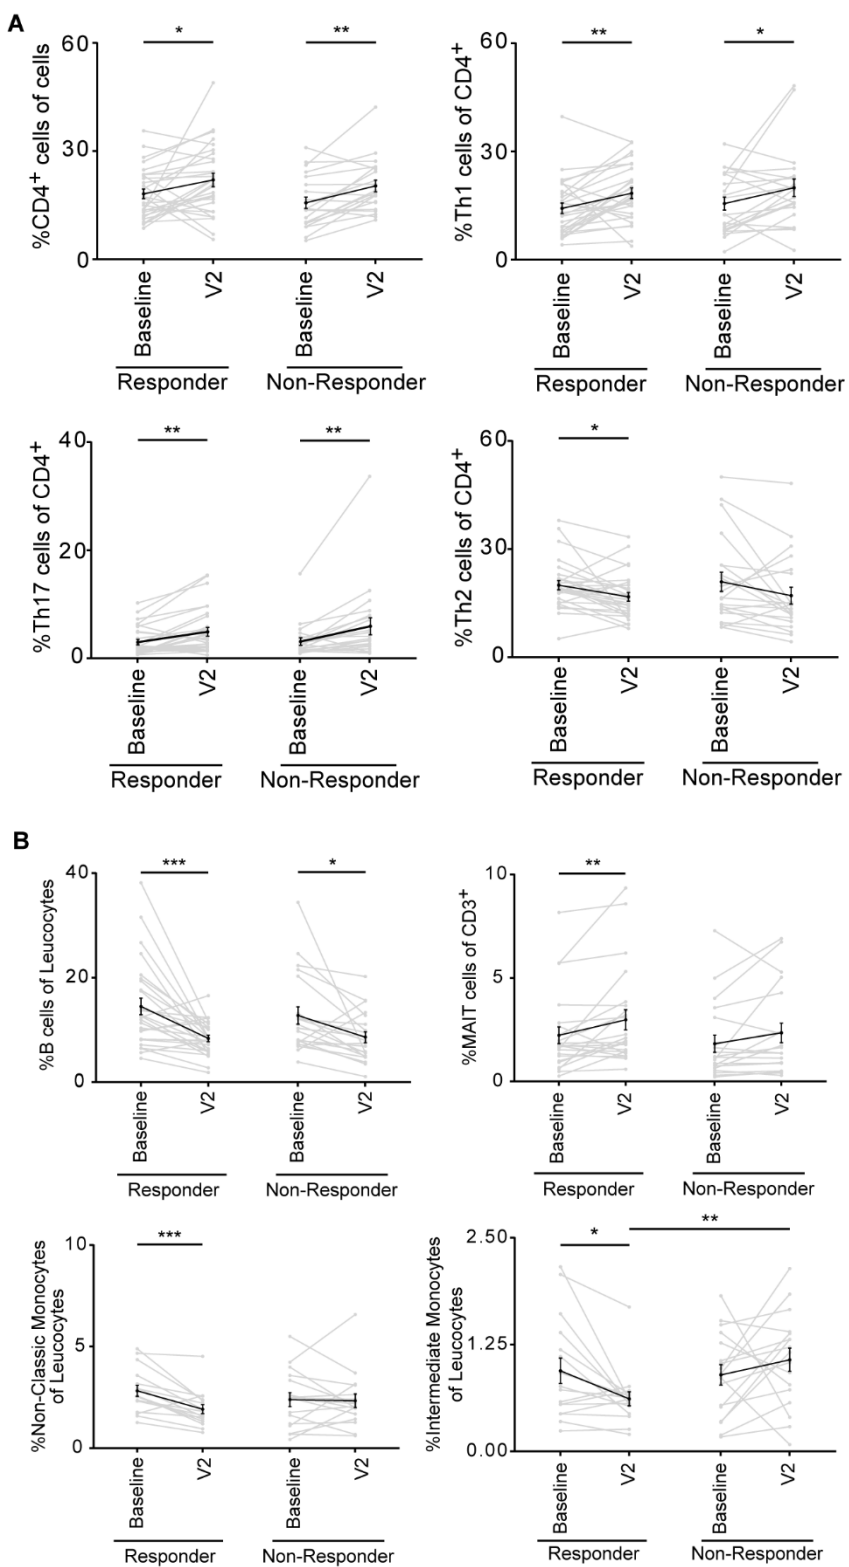

Figure 4

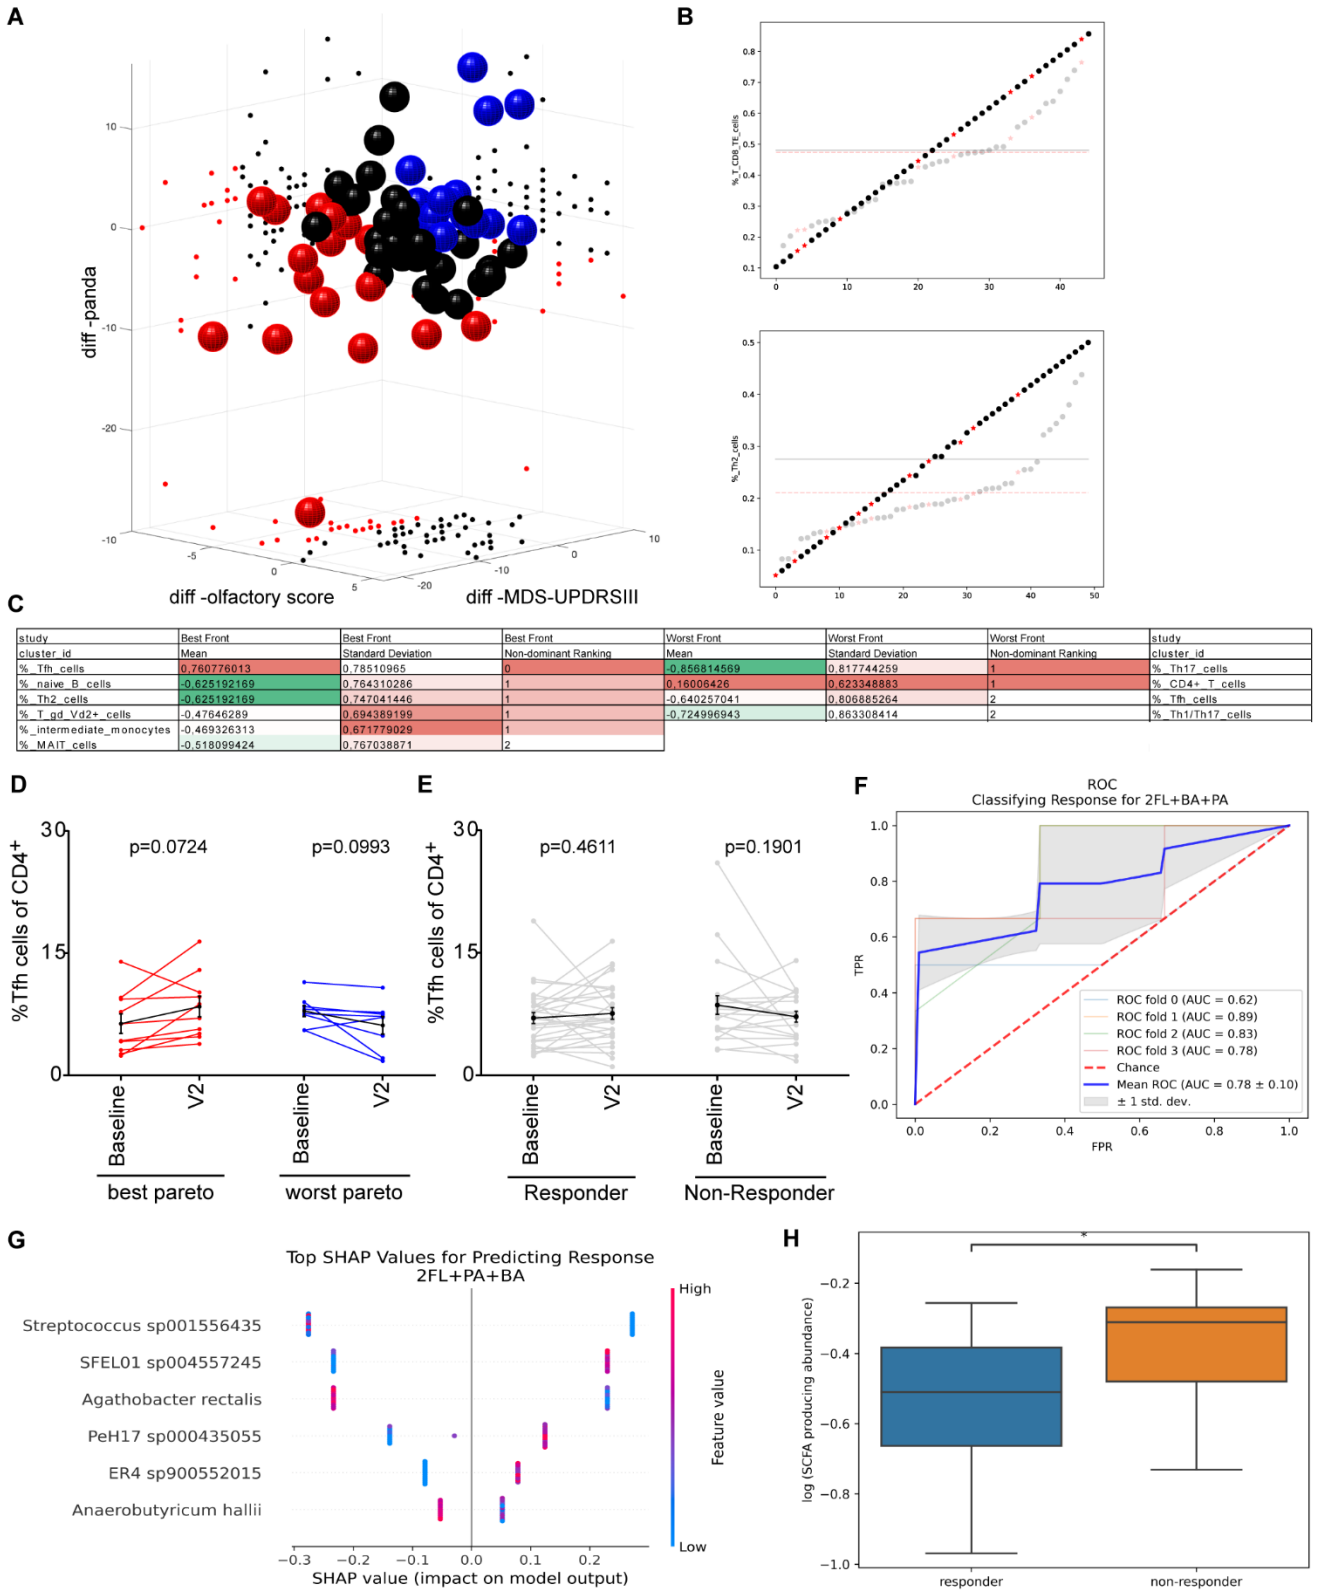

## Supplementary Figure S1

CONSORT 2010 Flow Diagram

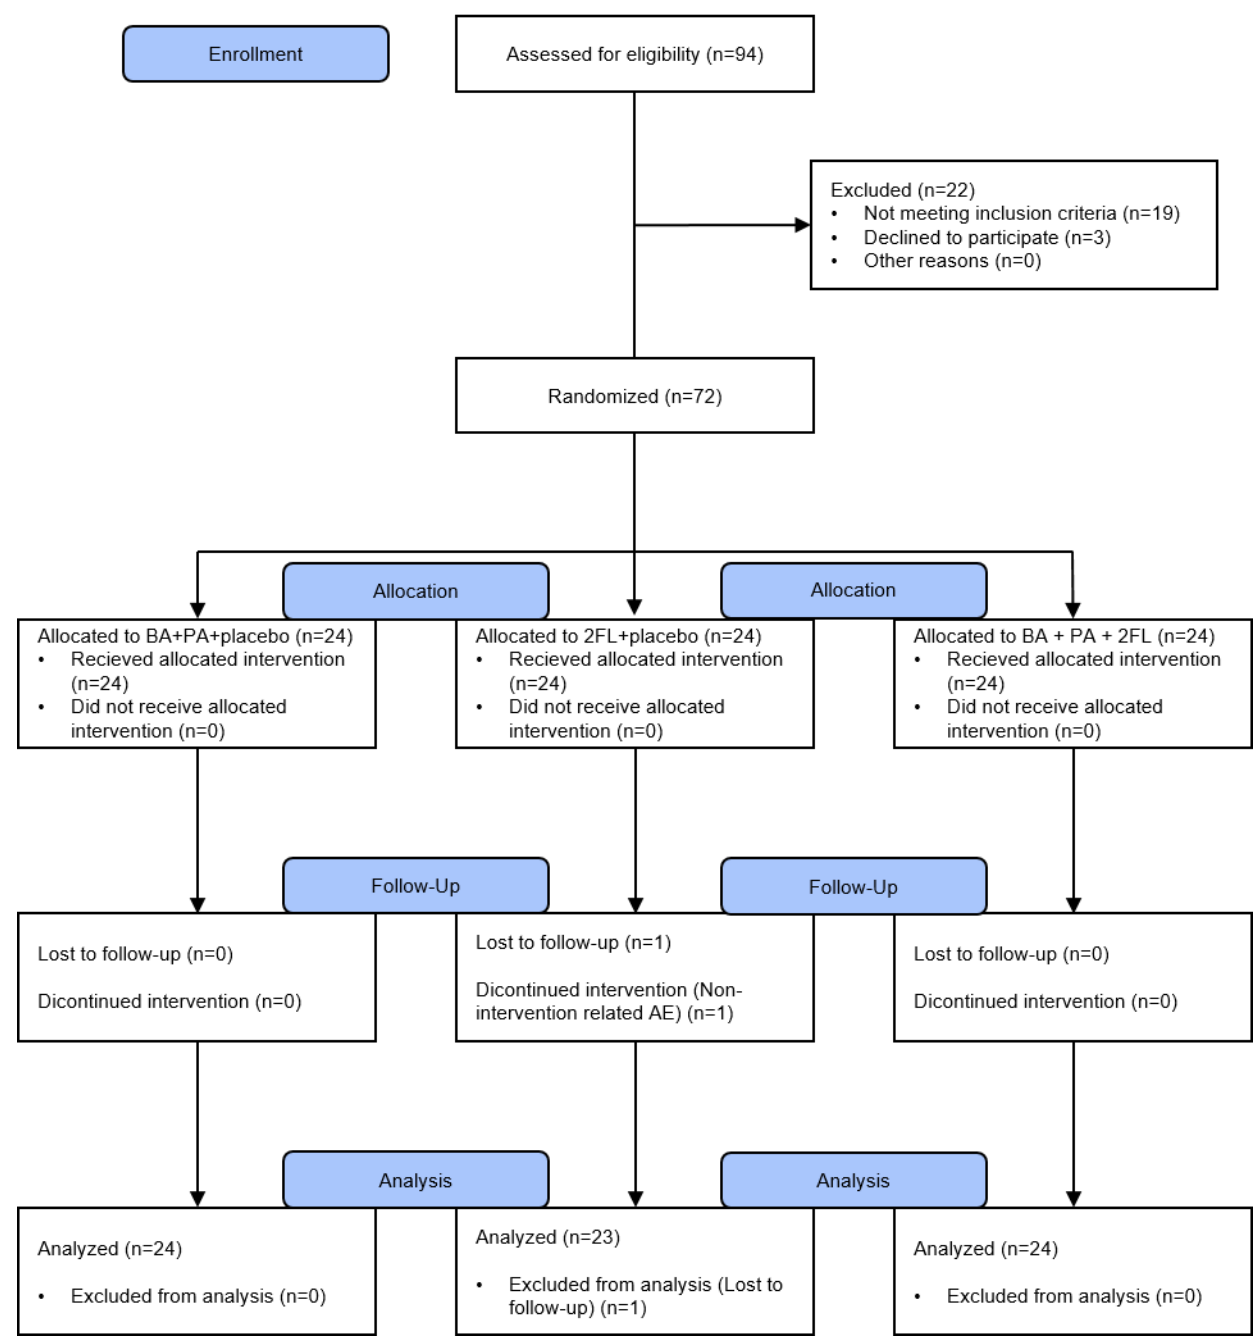

## Supplementary Figure S2

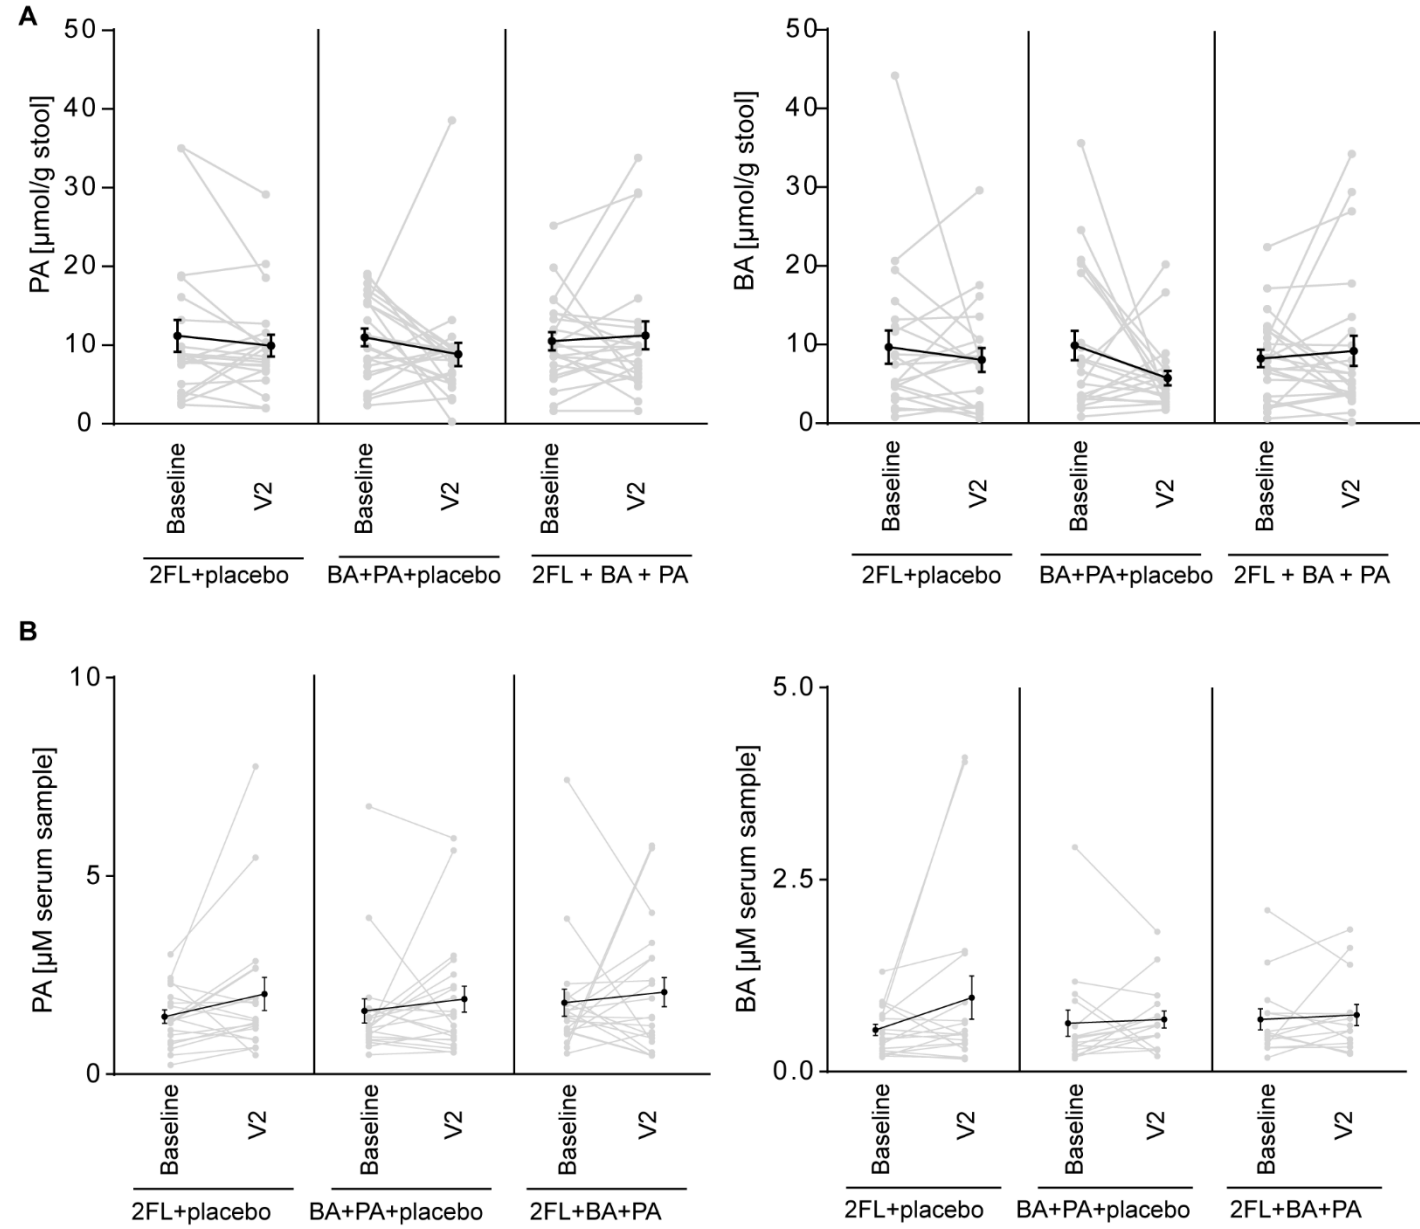

### Supplementary Figure S3

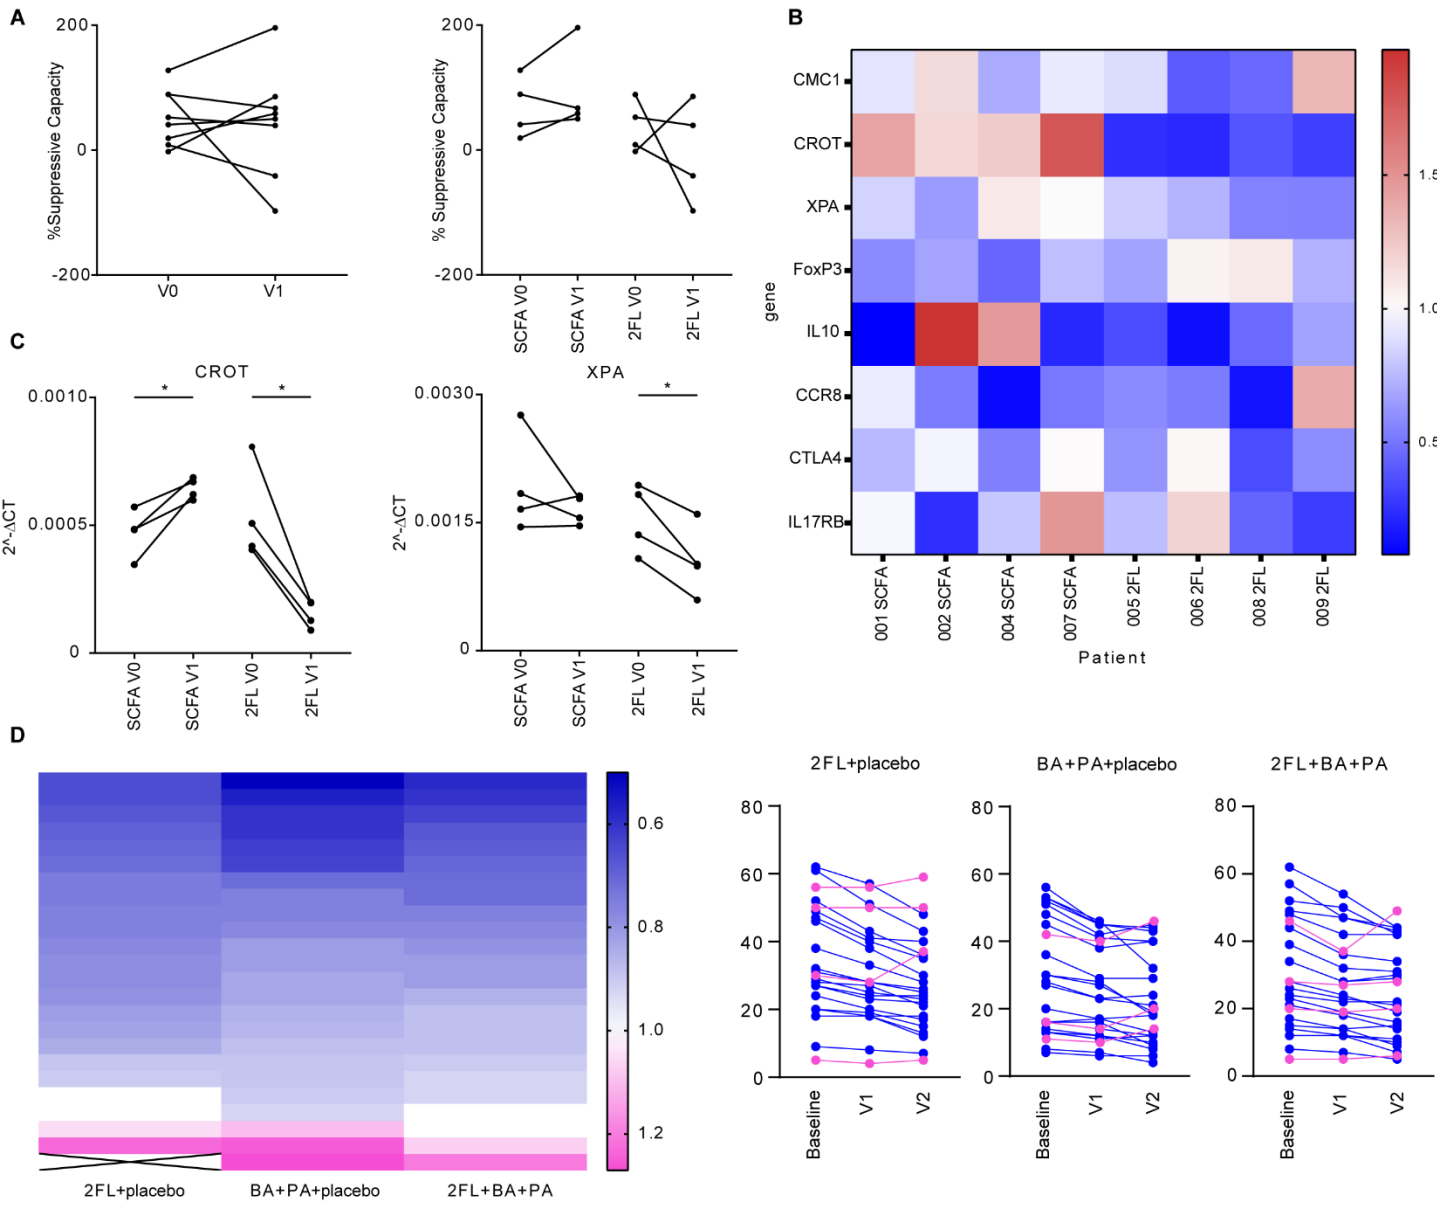

| Surface Marker      | Clone  | Fluorochrome    | Company   | Cat-Nr.     | Panel   |
|---------------------|--------|-----------------|-----------|-------------|---------|
| CD3                 | UCHT1  | FITC            | BioLegend | 300440      | 1, 2, 4 |
| CD4                 | RPAT4  | APC Fire 750    | BioLegend | 300560      | 1       |
| CD25                | M-A251 | BV785           | BioLegend | 356140      | 1       |
| CD127               | A019D5 | APC             | BioLegend | 351316      | 1       |
| CXCR5               | J25204 | PE/Dazzle 594   | BioLegend | 356928      | 1       |
| CD45RA              | H100   | BV605           | BioLegend | 304134      | 1,2     |
| CCR7                | G043H7 | PerCP/Cy5.5     | BioLegend | 353220      | 1,2     |
| CCR6                | 11A9   | PE              | BD        | 559562      | 1       |
| CXCR3               | G025H7 | BV650           | BioLegend | 353730      | 1       |
| CCR4                | L2A1H4 | BV421           | BioLegend | 359414      | 1       |
| CD8                 | SK1    | APC Fire 750    | BioLegend | 344746      | 2       |
| CD161               | HP3G10 | PE              | BioLegend | 339904      | 2       |
| V $\alpha$ 7.2      | 3C10   | BV785           | BioLegend | 351722      | 2       |
| TCR $\gamma/\delta$ | 11F2   | APC             | Miltenyi  | 130-113-500 | 2       |
| V $\alpha$ 2        | B6     | BV421           | BioLegend | 331428      | 2       |
| CD19                | H1B19  | FITC            | BioLegend | 302206      | 3, 4    |
| IgD                 | 1A6-2  | PE/Dazzle 594   | BioLegend | 348240      | 3       |
| CD45                | H130   | Alexa Fluor 700 | BioLegend | 304024      | 3, 4    |
| CD27                | 323    | BV421           | BioLegend | 302824      | 3       |
| CD38                | HIT2   | APC             | BioLegend | 303510      | 3       |
| CD34                | 563    | PE              | BD        | 550761      | 3       |
| CD11c               | B-LY6  | APC             | BD        | 559877      | 4       |
| CD14                | HCD14  | PE/Dazzle 594   | BioLegend | 325634      | 4       |
| CD16                | 3G8    | APC Fire 750    | BioLegend | 302060      | 4       |
| CD56                | HCD56  | PerCP/Cy5.5     | BioLegend | 318322      | 4       |
| CD11b               | ICRF44 | PE              | BioLegend | 301306      | 4       |
| CD123               | 6H6    | BV605           | BioLegend | 306026      | 4       |
| HLA-DR              | L243   | BV785           | BioLegend | 307642      | 4       |

**Supplementary table S1:** List of antibodies used for in-depth immunophenotyping.

| <b>Panel 1 - CD4 T cells</b>                                                                                                                                                                                                                                 |                                                            |                                                                                                                                                                                                                                                                                                                                                                                                                                                                                                                                                                                                                                                                                                                                                                                                                                                         |                                                                                                                                                                                                                                                                                                                                                                                                   |
|--------------------------------------------------------------------------------------------------------------------------------------------------------------------------------------------------------------------------------------------------------------|------------------------------------------------------------|---------------------------------------------------------------------------------------------------------------------------------------------------------------------------------------------------------------------------------------------------------------------------------------------------------------------------------------------------------------------------------------------------------------------------------------------------------------------------------------------------------------------------------------------------------------------------------------------------------------------------------------------------------------------------------------------------------------------------------------------------------------------------------------------------------------------------------------------------------|---------------------------------------------------------------------------------------------------------------------------------------------------------------------------------------------------------------------------------------------------------------------------------------------------------------------------------------------------------------------------------------------------|
| <b>Cell type</b>                                                                                                                                                                                                                                             | <b>Gating strategy</b>                                     |                                                                                                                                                                                                                                                                                                                                                                                                                                                                                                                                                                                                                                                                                                                                                                                                                                                         |                                                                                                                                                                                                                                                                                                                                                                                                   |
| CD4+ T cells<br>T follicular helper (Tfh)<br>T regulatory cells (Tregs)<br>T helper 1 (Th1)<br>T helper 1/T helper 17 (Th1/17)<br>T helper 17 (Th17)<br>T helper 2 (Th2)<br>T CD4 terminal effector (TE)<br><br>T CD4 Naïve                                  | CD3 <sup>+</sup><br>CD4 <sup>+</sup>                       | CXCR5 <sup>+</sup><br>CXCR5 <sup>-</sup> CD25 <sup>high</sup> CD127 <sup>low</sup><br>CXCR5 <sup>-</sup> CD127 <sup>+</sup> CD25 <sup>-/low</sup> CXCR3 <sup>+</sup> CCR6 <sup>-</sup><br>CXCR5 <sup>-</sup> CD127 <sup>+</sup> CD25 <sup>-/low</sup> CXCR3 <sup>+</sup> CCR6 <sup>+</sup><br>CXCR5 <sup>-</sup> CD127 <sup>+</sup> CD25 <sup>-/low</sup> CXCR3 <sup>-</sup> CCR6 <sup>+</sup><br>CXCR5 <sup>-</sup> CD127 <sup>+</sup> CD25 <sup>-/low</sup> CXCR3 <sup>-</sup> CCR6 <sup>-</sup> CCR4 <sup>+</sup><br>CXCR5 <sup>-</sup> CD127 <sup>+</sup> CD25 <sup>-/low</sup> CXCR3 <sup>-</sup> CCR6 <sup>-</sup> CCR4 <sup>-</sup><br>CCR7 <sup>-</sup> CD45RA <sup>low</sup><br>CXCR5 <sup>-</sup> CD127 <sup>+</sup> CD25 <sup>-/low</sup> CXCR3 <sup>-</sup> CCR6 <sup>-</sup> CCR4 <sup>-</sup><br>CCR7 <sup>+</sup> CD45RA <sup>high</sup> |                                                                                                                                                                                                                                                                                                                                                                                                   |
| <b>Panel 2 - CD8, <math>\gamma/\delta</math> and MAIT T cells</b>                                                                                                                                                                                            |                                                            |                                                                                                                                                                                                                                                                                                                                                                                                                                                                                                                                                                                                                                                                                                                                                                                                                                                         |                                                                                                                                                                                                                                                                                                                                                                                                   |
| <b>Cell type</b>                                                                                                                                                                                                                                             | <b>Gating strategy</b>                                     |                                                                                                                                                                                                                                                                                                                                                                                                                                                                                                                                                                                                                                                                                                                                                                                                                                                         |                                                                                                                                                                                                                                                                                                                                                                                                   |
| CD8+ T cells<br>$\gamma/\delta$ Vd2 <sup>+</sup> (T $\gamma/\delta$ Vd2+)<br>$\gamma/\delta$ Vd2 <sup>-</sup> (T $\gamma/\delta$ non-Vd2+)<br>MAIT<br>T CD8 Naïve<br>T CD8 central memory (CM)<br>T CD8 effector memory (EM)<br>T CD8 terminal effector (TE) | CD3 <sup>+</sup>                                           | TCR $\gamma/\delta$ <sup>-</sup><br>TCR $\gamma/\delta$ <sup>+</sup><br>TCR $\gamma/\delta$ <sup>-</sup> Vd2 <sup>-</sup><br>CD8 <sup>+</sup> TCR $\gamma/\delta$ <sup>-</sup><br>Vd2 <sup>-</sup>                                                                                                                                                                                                                                                                                                                                                                                                                                                                                                                                                                                                                                                      | CD16 <sup>high</sup> NOT V $\alpha$ 7.2 <sup>+</sup><br>Vd2 <sup>+</sup><br>Vd2 <sup>-</sup><br>V $\alpha$ 7.2 <sup>+</sup> CD161 <sup>high</sup><br>CCR7 <sup>+</sup> CD45RA <sup>+</sup><br>CCR7 <sup>+</sup> CD45RA <sup>-</sup><br>CCR7 <sup>-</sup> CD45RA <sup>-</sup><br>CCR7 <sup>-</sup> CD45RA <sup>+</sup>                                                                             |
| <b>PANEL 3 - B cells and Progenitors</b>                                                                                                                                                                                                                     |                                                            |                                                                                                                                                                                                                                                                                                                                                                                                                                                                                                                                                                                                                                                                                                                                                                                                                                                         |                                                                                                                                                                                                                                                                                                                                                                                                   |
| <b>Cell type</b>                                                                                                                                                                                                                                             | <b>Gating strategy</b>                                     |                                                                                                                                                                                                                                                                                                                                                                                                                                                                                                                                                                                                                                                                                                                                                                                                                                                         |                                                                                                                                                                                                                                                                                                                                                                                                   |
| Progenitors<br>Total B cells (B cells)<br>Naïve B cells (B naïve)<br>Nonswitched memory B cells (B NSM)<br>Exhausted B cells (B EX)<br>Switched memory B cells (BSM)<br>Plasmablasts                                                                         | CD45 <sup>+</sup>                                          | CD34 <sup>+</sup> CD45 <sup>low</sup><br>CD19 <sup>+</sup> CD34 <sup>-</sup>                                                                                                                                                                                                                                                                                                                                                                                                                                                                                                                                                                                                                                                                                                                                                                            | CD27 <sup>-</sup> IgD <sup>+</sup><br>CD27 <sup>+</sup> IgD <sup>+</sup><br>CD27 <sup>-</sup> IgD <sup>-</sup><br>CD27 <sup>+</sup> IgD <sup>-</sup> CD38 <sup>low</sup><br>CD27 <sup>+</sup> IgD <sup>-</sup> CD38 <sup>high</sup>                                                                                                                                                               |
| <b>Panel 4 - Monocytes, DCs, NK cells, Low-density basophils</b>                                                                                                                                                                                             |                                                            |                                                                                                                                                                                                                                                                                                                                                                                                                                                                                                                                                                                                                                                                                                                                                                                                                                                         |                                                                                                                                                                                                                                                                                                                                                                                                   |
| <b>Cell type</b>                                                                                                                                                                                                                                             | <b>Gating strategy</b>                                     |                                                                                                                                                                                                                                                                                                                                                                                                                                                                                                                                                                                                                                                                                                                                                                                                                                                         |                                                                                                                                                                                                                                                                                                                                                                                                   |
| NK cells<br><br>Classic (C) monocytes<br>Intermediate (I) monocytes<br>Nonclassic (NC) monocytes<br>Myeloid dendritic cells (mDCs)<br>Plasmacytoid dendritic cells (pDCs)<br><br>Low-density (LD) basophils                                                  | CD45 <sup>+</sup><br>CD3 <sup>-</sup><br>CD19 <sup>-</sup> | CD11c <sup>+</sup><br>CD16 <sup>-</sup> CD56 <sup>-</sup>                                                                                                                                                                                                                                                                                                                                                                                                                                                                                                                                                                                                                                                                                                                                                                                               | CD16 <sup>+/-</sup> CD56 <sup>+/low</sup> CD14 <sup>-</sup><br>CD11c <sup>-</sup><br>CD14 <sup>+</sup> CD16 <sup>-</sup><br>CD14 <sup>+</sup> CD16 <sup>+</sup><br>CD14 <sup>low</sup> CD16 <sup>+</sup><br>HLA-DR <sup>+</sup> CD11c <sup>+</sup> CD123 <sup>low</sup><br>HLA-DR <sup>+</sup> CD11c <sup>-</sup> CD123 <sup>+</sup><br>HLA-DR <sup>-</sup> CD123 <sup>+</sup> CD11b <sup>+</sup> |

**Supplementary table S2:** Gating strategies for in-depth immuno-phenotyping of immune cell subsets. Adapted from Monaco et al. (17).



| Characteristics                              | PA+BA+placebo<br>(n=24) | 2FL+placebo<br>(n=24) | 2FL+PA+BA<br>(n=24) |
|----------------------------------------------|-------------------------|-----------------------|---------------------|
| Female sex                                   | 13 (54.2%)              | 9 (37.5%)             | 13 (54.2%)          |
| Age, years                                   | 62(±9)                  | 67 (±12)              | 65 (±8)             |
| Duration of disease, years                   | 7 (±7)                  | 6 (±6)                | 4 (±4)              |
| BMI                                          | 26 (±4)                 | 26 (±3)               | 25 (±3)             |
| Subgroups                                    |                         |                       |                     |
| akinetic-rigid                               | 8 (33.3%)               | 9 (37.5%)             | 11 (45.8%)          |
| equivalent                                   | 14 (58.3%)              | 12 (50%)              | 12 (50%)            |
| tremordominant                               | 2 (8.3 %)               | 3 (12.5%)             | 1 (4.17%)           |
| Medication                                   |                         |                       |                     |
| LEDD [mg]                                    | 770 (±302)              | 785 (±267)            | 756 (±261)          |
| 95% CI                                       | 642.1-897.1             | 672.2-897.3           | 646-866.5           |
| Benserazide                                  | 24 (100%)               | 22 (91.7%)            | 23 (95.8%)          |
| Carbidopa                                    | 4 (16.7%)               | 5 (20.8%)             | 2 (8.3%)            |
| Piribedil                                    | 2 (8.3%)                | 0                     | 2 (8.3%)            |
| Rotigotine                                   | 2 (8.3%)                | 3 (12.5%)             | 3 (12.5%)           |
| Ropinirole                                   | 2 (8.3%)                | 1 (4.17%)             | 2 (8.3%)            |
| Pramipexole                                  | 4 (16.7%)               | 2 (8.3%)              | 4 (16.7%)           |
| Rasagiline                                   | 13 (54.2%)              | 8 (33.3%)             | 14 (58.3%)          |
| Selegiline                                   | 3 (12.5%)               | 9 (37.5%)             | 3 (12.5%)           |
| Safinamide                                   | 2 (8.3%)                | 1 (4.2%)              | 2 (8.3%)            |
| COMT-inhibitor                               | 6 (25%)                 | 8 (33.3%)             | 9 (37.5%)           |
| Amantadine                                   | 2 (8.3 %)               | 2 (8.3 %)             | 1 (4.2%)            |
| Apomorphine                                  | 0                       | 0                     | 0                   |
| Anticholinergics                             | 0                       | 1 (4.2%)              | 0                   |
| Clozapine                                    | 1 (4.2%)                | 0                     | 2 (8.3%)            |
| Quetiapine                                   | 1 (4.2%)                | 3 (12.5%)             | 1 (4.2%)            |
| MDS-Unified Parkinson's Disease Rating Scale |                         |                       |                     |
| MDS-UPDRS I                                  | 10 (±10)                | 17 (±12)              | 17 (±13)            |
| 95% CI                                       | 12.6-21                 | 12.1-22.5             | 11.2-22.1           |
| MDS-UPDRS II                                 | 9 (±6)                  | 9 (±8)                | 10 (±9)             |
| 95% CI                                       | 6.8-12.1                | 6.3-12.7              | 6-13.4              |
| MDS-UPDRS III                                | 29 (±17)                | 33 (±16)              | 30 (±16)            |
| 95% CI                                       | 22.1-36.3               | 26.3-40               | 23-36.8             |
| MDS-UPDRS IV                                 | 3 (± 3)                 | 5 (±5)                | 3 (±3)              |
| 95% CI                                       | 1.8-4.2                 | 2.5-6.3               | 1.4-4.1             |
| Hoehn & Yahr scale                           | 2 (±1)                  | 2 (±1)                | 2 (±1)              |
| 95% CI                                       | 1.9-2.5                 | 1.9-2.4               | 1.9-2.7             |
| PANDA                                        | 25 (±4)                 | 33 (±16)              | 30 (±16)            |
| 95% CI                                       | 23.7-26.7               | 18.9-24.8             | 20.8-26.1           |
| Olfactory score                              | 8 (±3)                  | 7 (±3)                | 7 (±3)              |
| 95% CI                                       | 6.8-9                   | 5.9-8.1               | 5.6-8.1             |

**Supplementary table S3:** Demographic data.
